# Supplementary material for: The unique sandwich K6Be2B6H6 cluster with a real borozene B6H6 core
Source: Royal Society of Chemistry journal article supplement (doi:10.1039/d2ra00692h), 2022-01-01
Supplement: d2ra00692h2.pdf [file d2ra00692h2.pdf]

## SUPPLEMENTARY INFORMATION

### The Unique Sandwich $K_6Be_2B_6H_6$ Cluster with a Real Borozene $B_6H_6$ Core†

Ying-Jin Wang,\*<sup>a</sup> Lin-Yan Feng,<sup>ab</sup> Miao Yan,<sup>a</sup> Chang-Qing Miao,<sup>a</sup> Su-Qin Feng,<sup>a</sup> and Hua-Jin  
Zhai\*<sup>b</sup>

<sup>a</sup>Department of Chemistry, Xinzhou Teachers University, Xinzhou 034000, Shanxi, China

<sup>b</sup>Nanocluster Laboratory, Institute of Molecular Science, Shanxi University, Taiyuan 030006, China

\*E-mail: yingjinwang@sxu.edu.cn; hj.zhai@sxu.edu.cn

### Supplementary Information – Part I

- Table S1.** Cartesian coordinates for selected structures of  $K_6Be_2B_6H_6$  cluster at the PBE0/6-311+G(d,p) level:  $D_{3d}$  ( $^1A_{1g}$ ) global-minimum (GM),  $D_{3h}$  ( $^1A_1'$ ) low-lying isomer (LM), and two transition state (TS) structures of  $D_{3d}$  ( $^1A_{1g}$ ) TS<sub>1</sub> and  $D_{3h}$  ( $^1A_1'$ ) TS<sub>2</sub>.
- Figure S1.** Alternative optimized isomers of  $K_6Be_2B_6H_6$  cluster. Relative energies are shown in square brackets at the PBE0/6-311+G(d,p) level with corrections for zero-point energies (ZPEs). Also shown are the relative energies for top five isomers at the single-point CCSD(T)/6-311+G(d,p)//PBE0/6-311+G(d,p) level. All energies are in eV.
- Figure S2.** Wiberg bond indices (WBIs) (a/c) and natural atomic charges (b/d, in |e|) for GM ( $D_{3d}$ ,  $^1A_{1g}$ ) and LM ( $D_{3h}$ ,  $^1A_1'$ ) isomers of  $K_6Be_2B_6H_6$  cluster from the natural bond orbital (NBO) analyses at the PBE0/6-311+G(d,p) level.

- Figure S3.** Occupied canonical molecular orbitals (CMOs) of  $D_{3h}$  ( $^1A_1'$ ) LM for  $K_6Be_2B_6H_6$  cluster. (a) Six  $\sigma$  CMOs for six B–B  $\sigma$  bonds. (b) Six  $\sigma$  CMOs for six B–H  $\sigma$  bonds. (c) Three delocalized  $\pi$  CMOs on  $B_6H_6$  ring. (d) Two  $\sigma$  CMOs over two tetrahedral  $K_3Be$  ligands.
- Figure S4.** Adaptive natural density partitioning (AdNDP) bonding pattern of  $D_{3h}$  ( $^1A_1'$ ) LM for  $K_6Be_2B_6H_6$  cluster. Occupation numbers (ONs) are indicated.
- Figure S5.** Displacement vectors for the soft vibrational modes of (a)  $D_{3d}$  ( $^1A_{1g}$ ) GM and (b)  $D_{3h}$  ( $^1A_1'$ ) LM structures for  $K_6Be_2B_6H_6$  cluster.

## Supplementary Information – Part II

A short movie extracted from the BOMD simulation for  $K_6Be_2B_6H_6$  cluster. The simulation was performed at the temperature of 300 K for 10 ps, starting from the equilibrium GM structure with random atom velocities. The movie roughly covers a time span of 4.2 ps.

**Figure S1.** Alternative optimized isomers of  $K_6Be_2B_6H_6$  cluster. Relative energies are shown in square brackets at the PBE0/6-311+G(d,p) level with corrections for zero-point energies (ZPEs). Also shown are the relative energies for top five isomers at the single-point CCSD(T)/6-311+G(d,p)//PBE0/6-311+G(d,p) level. All energies are in eV.

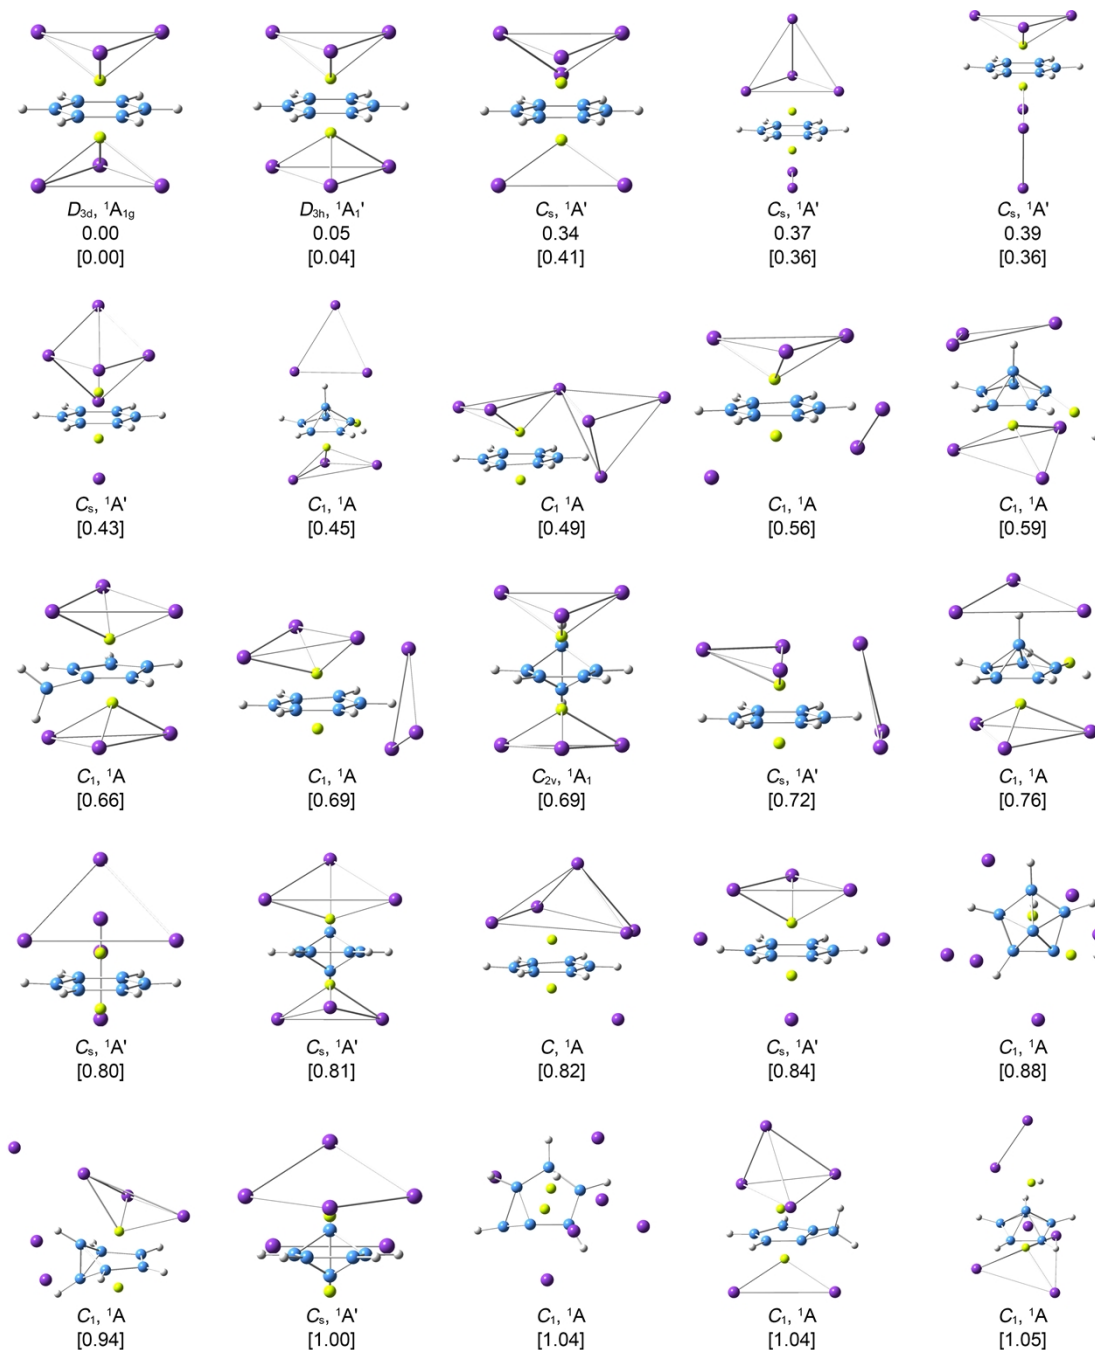

Continue .....

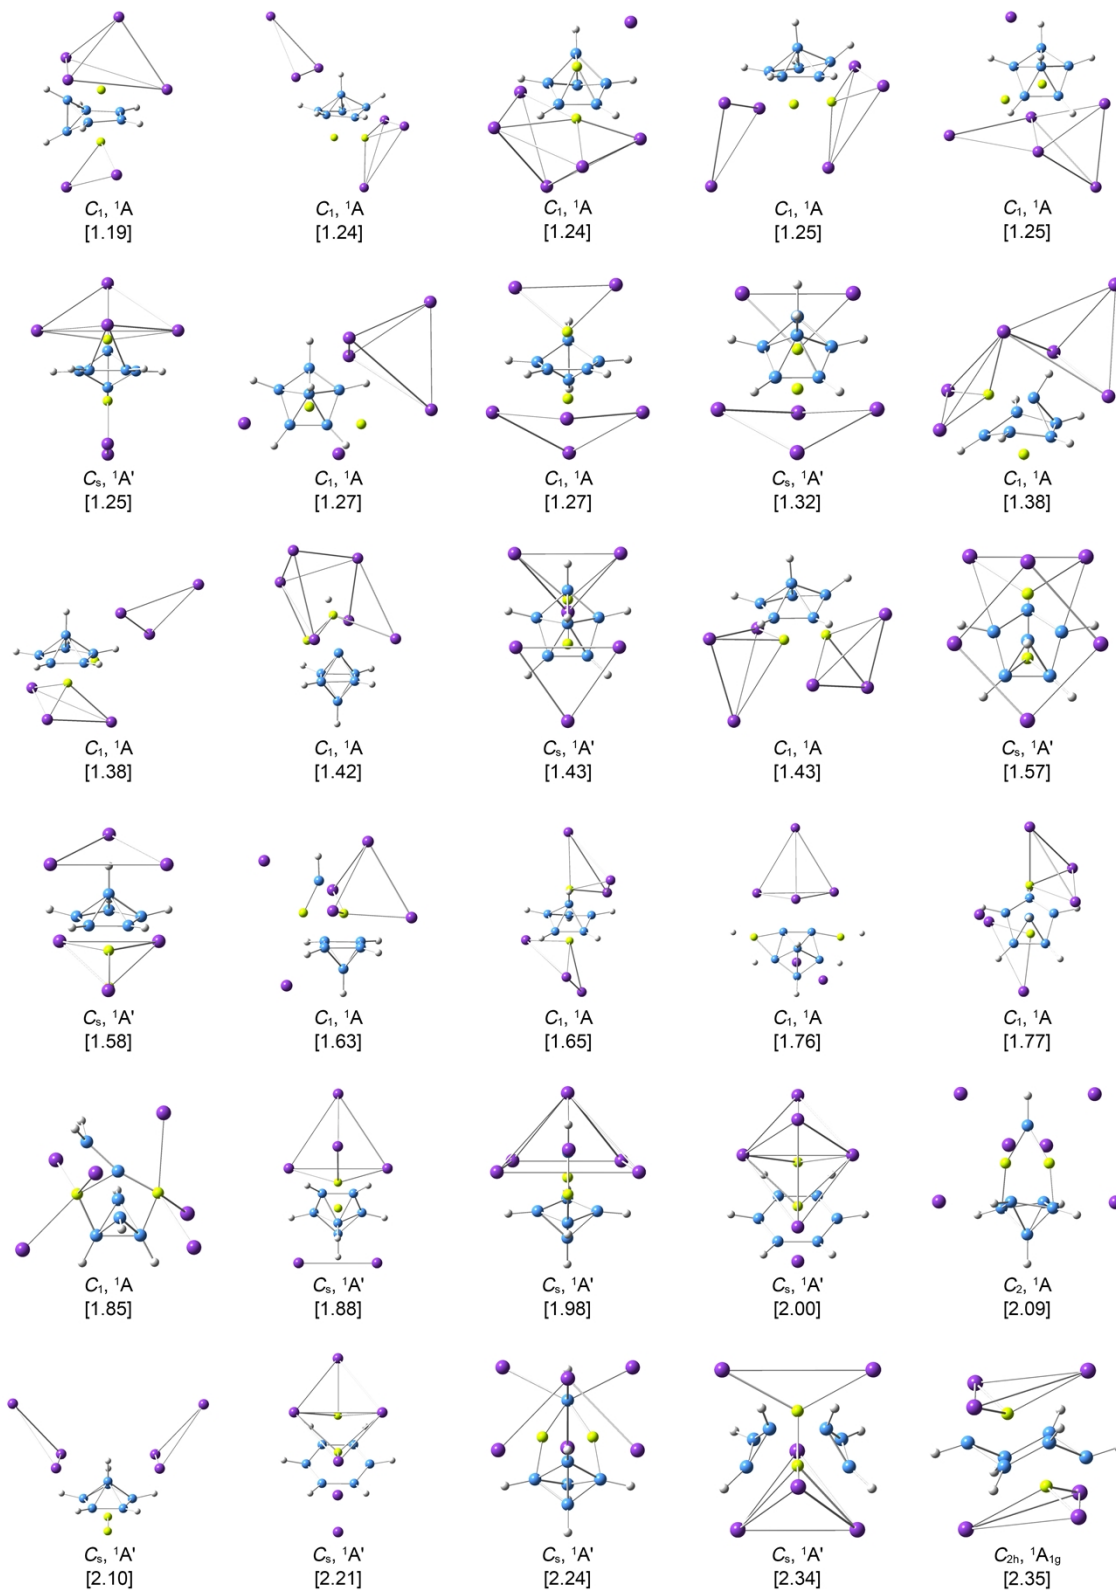

**Figure S2.** Wiberg bond indices (WBIs) (a/c) and natural atomic charges (b/d, in |e|) for  $D_{3d}$  ( $^1A_{1g}$ ) GM and  $D_{3h}$  ( $^1A_1'$ ) LM isomers of  $K_6Be_2B_6H_6$  cluster from the natural bond orbital (NBO) analyses at the PBE0/6-311+G(d,p) level.

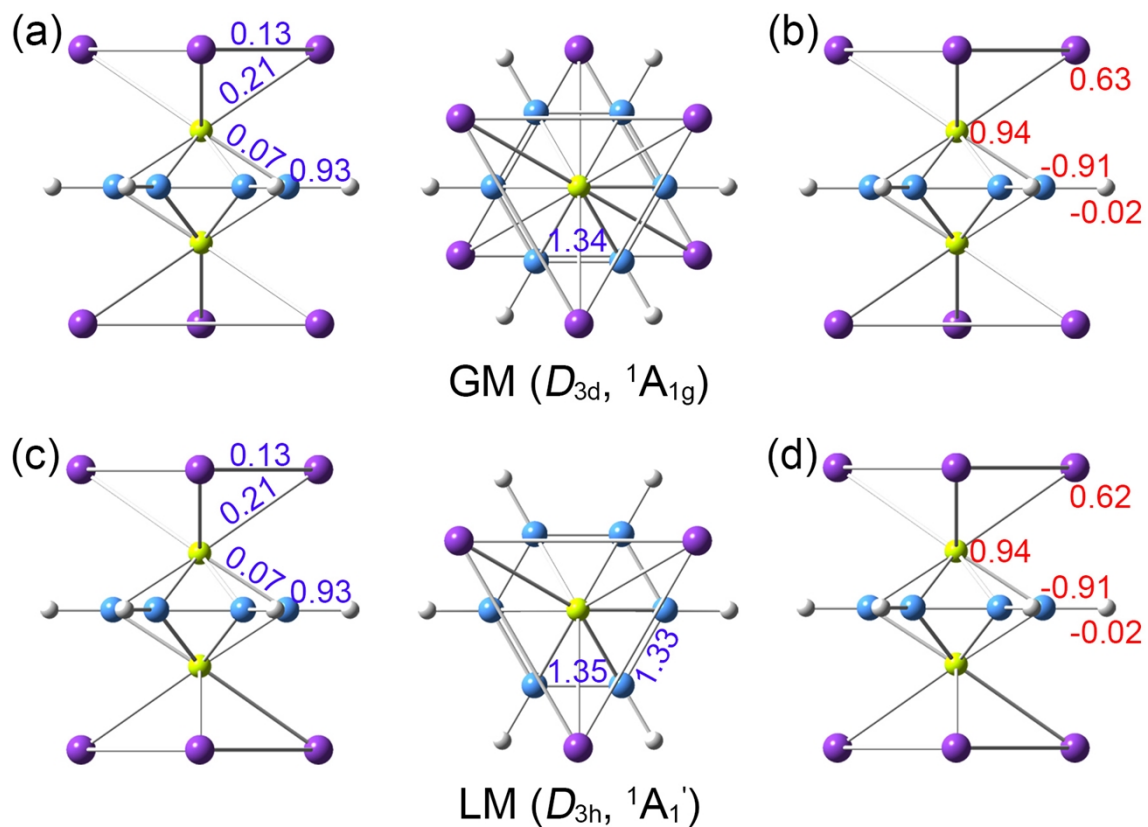

**Figure S3.** Occupied canonical molecular orbitals (CMOs) of  $D_{3h}$  ( $^1A_1'$ ) LM for  $K_6Be_2B_6H_6$  cluster. (a) Six  $\sigma$  CMOs for six B–B  $\sigma$  bonds. (b) Six  $\sigma$  CMOs for six B–H  $\sigma$  bonds. (c) Three delocalized  $\pi$  CMOs on  $B_6H_6$  ring. (d) Two  $\sigma$  CMOs over two tetrahedral  $K_3Be$  ligands.

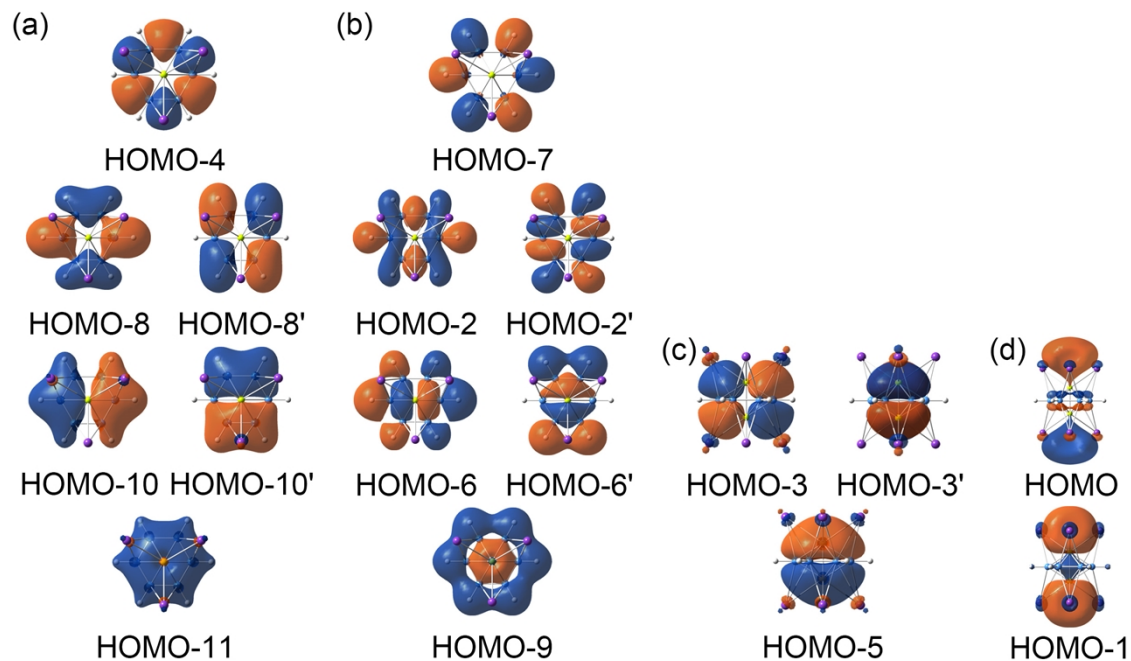

**Figure S4.** Adaptive natural density partitioning (AdNDP) bonding pattern of  $D_{3h}$  ( $^1A_1'$ ) LM for  $K_6Be_2B_6H_6$  cluster. Occupation numbers (ONs) are indicated.

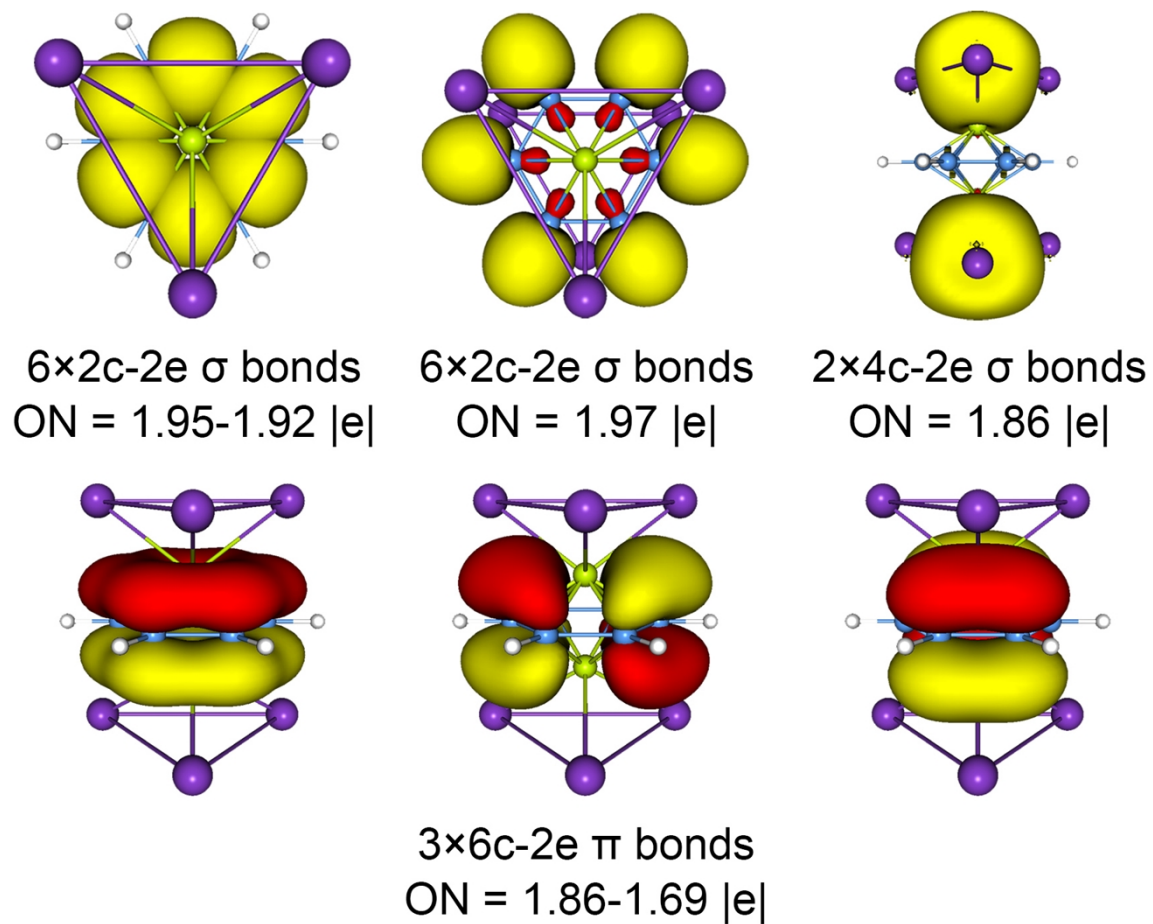

**Figure S5.** Displacement vectors for the soft vibrational modes of (a)  $D_{3d}$  ( ${}^1A_{1g}$ ) GM and (b)  $D_{3h}$  ( ${}^1A_1'$ ) LM structures for  $K_6Be_2B_6H_6$  cluster.

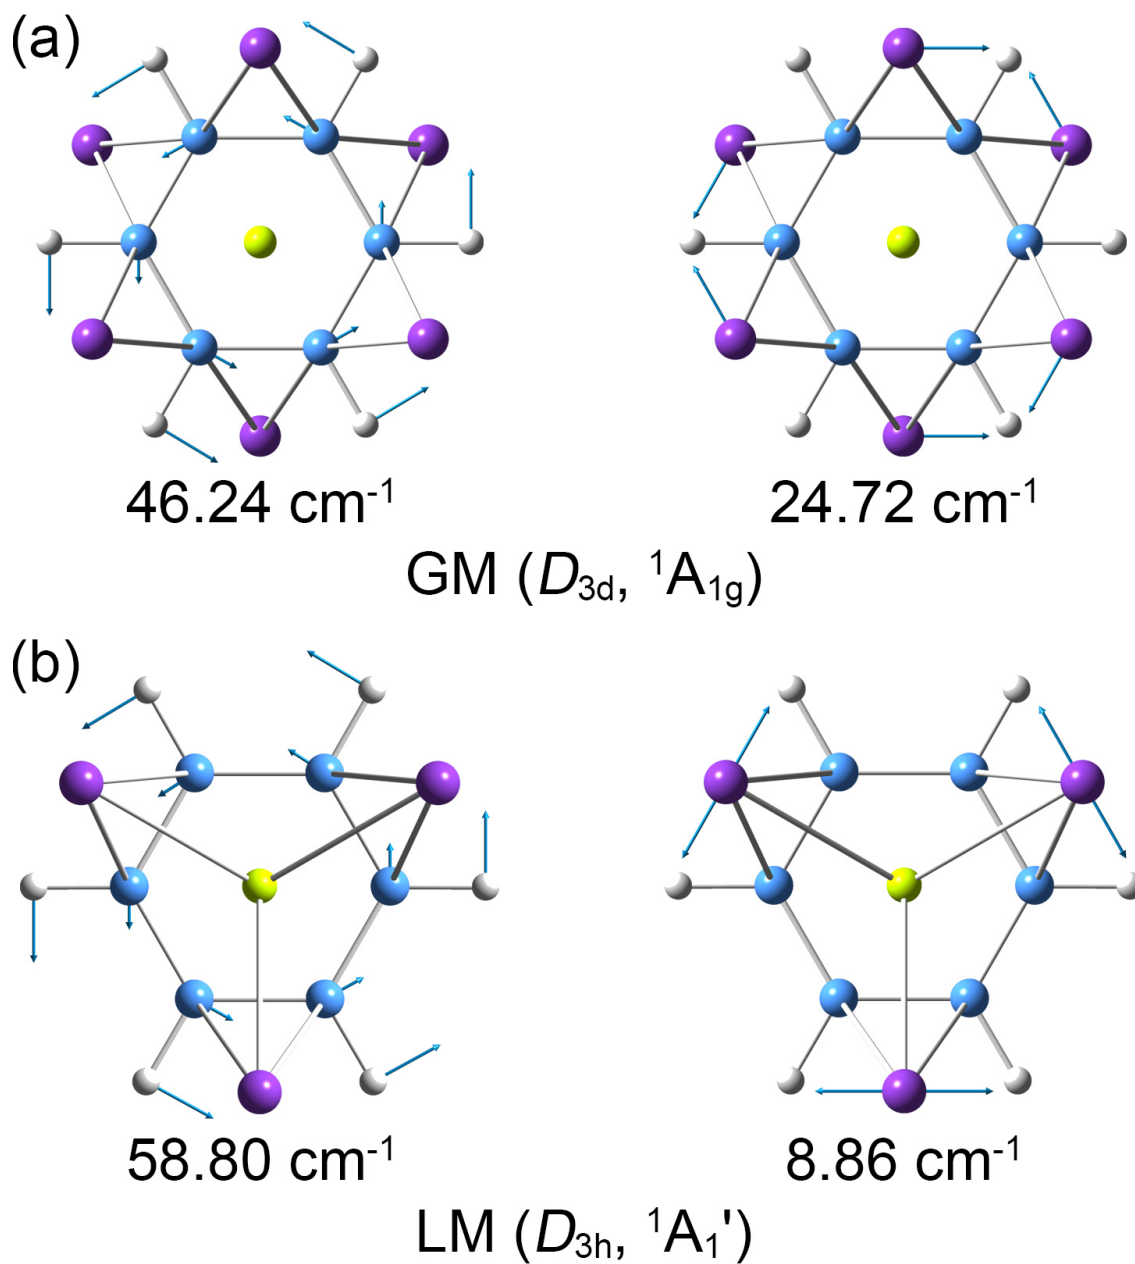



**Table S1.** Cartesian coordinates for selected structures of  $K_6Be_2B_6H_6$  cluster at the PBE0/6-311+G(d,p) level:  $D_{3d}$  ( $^1A_{1g}$ ) global-minimum (GM),  $D_{3h}$  ( $^1A_1'$ ) low-lying isomer (LM), and two transition state (TS) structures of  $D_{3d}$  ( $^1A_{1g}$ ) TS<sub>1</sub> and  $D_{3h}$  ( $^1A_1'$ ) TS<sub>2</sub>.

**$K_6Be_2B_6H_6$  GM ( $D_{3d}$ ,  $^1A_{1g}$ )**

|    |             |             |             |
|----|-------------|-------------|-------------|
| B  | 0.83544400  | 1.44703100  | 0.00000000  |
| B  | 1.67088800  | 0.00000000  | 0.00000000  |
| B  | 0.83544400  | -1.44703100 | 0.00000000  |
| B  | -0.83544400 | 1.44703100  | 0.00000000  |
| B  | -1.67088800 | 0.00000000  | 0.00000000  |
| B  | -0.83544400 | -1.44703100 | 0.00000000  |
| H  | -1.44802200 | -2.50804700 | 0.00000000  |
| H  | -2.89604300 | 0.00000000  | 0.00000000  |
| H  | -1.44802200 | 2.50804700  | 0.00000000  |
| H  | 1.44802200  | 2.50804700  | 0.00000000  |
| H  | 2.89604300  | 0.00000000  | 0.00000000  |
| H  | 1.44802200  | -2.50804700 | 0.00000000  |
| Be | 0.00000000  | 0.00000000  | 1.08940500  |
| Be | 0.00000000  | 0.00000000  | -1.08940500 |
| K  | -2.30689500 | -1.33188700 | 2.66900000  |
| K  | -2.30689500 | 1.33188700  | -2.66900000 |
| K  | 0.00000000  | 2.66377300  | 2.66900000  |
| K  | 2.30689500  | -1.33188700 | 2.66900000  |
| K  | 2.30689500  | 1.33188700  | -2.66900000 |
| K  | 0.00000000  | -2.66377300 | -2.66900000 |

**$K_6Be_2B_6H_6$  LM ( $D_{3h}$ ,  $^1A_1'$ )**

|   |             |            |            |
|---|-------------|------------|------------|
| B | -0.83355300 | 1.44936300 | 0.00000000 |
|---|-------------|------------|------------|

|    |             |             |             |
|----|-------------|-------------|-------------|
| B  | 0.83355300  | 1.44936300  | 0.00000000  |
| B  | 1.67196100  | -0.00280400 | 0.00000000  |
| B  | 0.83840900  | -1.44655900 | 0.00000000  |
| B  | -0.83840900 | -1.44655900 | 0.00000000  |
| B  | -1.67196100 | -0.00280400 | 0.00000000  |
| H  | 1.45616200  | -2.50482100 | 0.00000000  |
| H  | 2.89731900  | -0.00866300 | 0.00000000  |
| H  | 1.44115800  | 2.51348300  | 0.00000000  |
| H  | -1.44115800 | 2.51348300  | 0.00000000  |
| H  | -2.89731900 | -0.00866300 | 0.00000000  |
| H  | -1.45616200 | -2.50482100 | 0.00000000  |
| Be | 0.00000000  | 0.00000000  | 1.08745000  |
| Be | 0.00000000  | 0.00000000  | -1.08745000 |
| K  | 2.28679900  | 1.32028400  | -2.69435400 |
| K  | -2.28679900 | 1.32028400  | -2.69435400 |
| K  | 0.00000000  | -2.64056800 | -2.69435400 |
| K  | -2.28679900 | 1.32028400  | 2.69435400  |
| K  | 2.28679900  | 1.32028400  | 2.69435400  |
| K  | 0.00000000  | -2.64056800 | 2.69435400  |

**$K_6Be_2B_6H_6$  TS<sub>1</sub> ( $D_{3d}$ ,  $^1A_{1g}$ )**

|   |             |             |             |
|---|-------------|-------------|-------------|
| B | 0.00000000  | -1.67434600 | 0.02326300  |
| B | 1.45002600  | -0.83717300 | -0.02326300 |
| B | 1.45002600  | 0.83717300  | 0.02326300  |
| B | -1.45002600 | -0.83717300 | -0.02326300 |
| B | -1.45002600 | 0.83717300  | 0.02326300  |
| B | 0.00000000  | 1.67434600  | -0.02326300 |
| H | 0.00000000  | 2.89742500  | 0.00526300  |
| H | -2.50924400 | 1.44871300  | -0.00526300 |

|    |             |             |             |
|----|-------------|-------------|-------------|
| H  | -2.50924400 | -1.44871300 | 0.00526300  |
| H  | 0.00000000  | -2.89742500 | -0.00526300 |
| H  | 2.50924400  | -1.44871300 | 0.00526300  |
| H  | 2.50924400  | 1.44871300  | -0.00526300 |
| Be | 0.00000000  | 0.00000000  | 1.08139700  |
| Be | 0.00000000  | 0.00000000  | -1.08139700 |
| K  | 2.25832700  | 1.30384600  | -2.75013600 |
| K  | -2.25832700 | 1.30384600  | -2.75013600 |
| K  | 0.00000000  | 2.60769200  | 2.75013600  |
| K  | 2.25832700  | -1.30384600 | 2.75013600  |
| K  | 0.00000000  | -2.60769200 | -2.75013600 |
| K  | -2.25832700 | -1.30384600 | 2.75013600  |

**K<sub>6</sub>Be<sub>2</sub>B<sub>6</sub>H<sub>6</sub> TS<sub>2</sub> (*D*<sub>3h</sub>, <sup>1</sup>A<sub>1</sub>' )**

|    |             |             |             |
|----|-------------|-------------|-------------|
| B  | -1.46220300 | 0.84420300  | 0.00000000  |
| B  | 0.00000000  | 1.66241600  | 0.00000000  |
| B  | 1.46220300  | 0.84420300  | 0.00000000  |
| B  | -1.43969400 | -0.83120800 | 0.00000000  |
| B  | 0.00000000  | -1.68840700 | 0.00000000  |
| B  | 1.43969400  | -0.83120800 | 0.00000000  |
| H  | 2.50681000  | -1.44730800 | 0.00000000  |
| H  | 0.00000000  | -2.90277000 | 0.00000000  |
| H  | -2.50681000 | -1.44730800 | 0.00000000  |
| H  | -2.51387300 | 1.45138500  | 0.00000000  |
| H  | 0.00000000  | 2.89461500  | 0.00000000  |
| H  | 2.51387300  | 1.45138500  | 0.00000000  |
| Be | 0.00000000  | 0.00000000  | 1.07790100  |
| Be | 0.00000000  | 0.00000000  | -1.07790100 |
| K  | 2.24381600  | -1.29546800 | 2.78732900  |
| K  | -2.24381600 | -1.29546800 | -2.78732900 |

|   |             |             |             |
|---|-------------|-------------|-------------|
| K | -2.24381600 | -1.29546800 | 2.78732900  |
| K | 0.00000000  | 2.59093500  | 2.78732900  |
| K | 0.00000000  | 2.59093500  | -2.78732900 |
| K | 2.24381600  | -1.29546800 | -2.78732900 |
